# Supplementary material
Source: HighWire-hosted journal article supplement (https://www.g3journal.org/content/suppl/2015/08/21/g3.115.021493)
Supplement: TableS3.pdf [file TableS3.pdf]

**Table S3 Gene Ontology analysis of the genetic interactions identified with Pol  $\alpha$  (*pol1-4*) mutation**

Gene Ontology analysis was performed using Gorilla (Eden et al. 2009), last update May 2015

The GO term and their description are listed. The p-value, the False Discovery Rate (FDR) q-value and the enrichment (defined as follows: N is the total number of genes, B is the total number of genes associated with a specific GO term, n is the number of genes in the top of the user's input list or in the target set when appropriate, b is the number of genes in the intersection. Enrichment =  $(b/n) / (B/N)$ ) are shown for each GO term and hits with p-values of less than 0.01 were included. Results are listed beginning with GO categories with the highest enrichment.

N.B. No GO terms were enriched using the positive genetic interactions as a list.

**Cellular processes**

| GO term    | Description                                          | P-value  | FDR q-value | Enrichment (N, B, n, b) | Genes                                                 |
|------------|------------------------------------------------------|----------|-------------|-------------------------|-------------------------------------------------------|
| GO:0031573 | intra-S DNA damage checkpoint                        | 6.05E-09 | 9.32E-07    | 29.72 (4320,8,109,6)    | <i>DOT1 RAD9 MRC1 SGS1 DDC1 BRE1</i>                  |
| GO:0044783 | G1 DNA damage checkpoint                             | 6.14E-05 | 3.01E-03    | 29.72 (4320,4,109,3)    | <i>DOT1 RAD9 BRE1</i>                                 |
| GO:2000756 | regulation of peptidyl-lysine acetylation            | 1.51E-04 | 6.50E-03    | 23.78 (4320,5,109,3)    | <i>HIR3 ASF1 CHD1</i>                                 |
| GO:2000104 | negative regulation of DNA-dependent DNA replication | 1.51E-04 | 6.43E-03    | 23.78 (4320,5,109,3)    | <i>CSM3 MRC1 CHD1</i>                                 |
| GO:1901983 | regulation of protein acetylation                    | 1.51E-04 | 6.37E-03    | 23.78 (4320,5,109,3)    | <i>HIR3 ASF1 CHD1</i>                                 |
| GO:0035065 | regulation of histone acetylation                    | 1.51E-04 | 6.31E-03    | 23.78 (4320,5,109,3)    | <i>HIR3 ASF1 CHD1</i>                                 |
| GO:0070911 | global genome nucleotide-excision repair             | 1.51E-04 | 6.25E-03    | 23.78 (4320,5,109,3)    | <i>DOT1 RTF1 ELC1</i>                                 |
| GO:0044773 | mitotic DNA damage checkpoint                        | 4.35E-08 | 3.91E-06    | 23.78 (4320,10,109,6)   | <i>DOT1 RAD9 MRC1 DDC1 SGS1 BRE1</i>                  |
| GO:0006336 | DNA replication-independent nucleosome assembly      | 2.96E-04 | 1.16E-02    | 19.82 (4320,6,109,3)    | <i>HIR3 ASF1 HPC2</i>                                 |
| GO:0000077 | DNA damage checkpoint                                | 2.23E-10 | 6.00E-08    | 18.77 (4320,19,109,9)   | <i>DOT1 BMH1 RAD9 RAD24 MRC1 DDC1 SGS1 BRE1 RAD17</i> |
| GO:0000722 | telomere maintenance via recombination               | 5.09E-08 | 4.23E-06    | 17.34 (4320,16,109,7)   | <i>RAD52 IES5 RAD57 SGS1 BRE1 RAD50 NHP10</i>         |
| GO:0000729 | DNA double-strand break processing                   | 5.08E-04 | 1.86E-02    | 16.99 (4320,7,109,3)    | <i>RIF1 SGS1 RAD50</i>                                |
| GO:0030472 | mitotic spindle organization in nucleus              | 5.08E-04 | 1.84E-02    | 16.99 (4320,7,109,3)    | <i>CIK1 RRD1 RRD2</i>                                 |
| GO:0034724 | DNA replication-independent nucleosome organization  | 7.98E-04 | 2.80E-02    | 14.86 (4320,8,109,3)    | <i>HIR3 ASF1 HPC2</i>                                 |

|            |                                                                        |          |          |                        |                                                                             |
|------------|------------------------------------------------------------------------|----------|----------|------------------------|-----------------------------------------------------------------------------|
| GO:0044774 | mitotic DNA integrity checkpoint                                       | 1.47E-06 | 9.58E-05 | 14.86 (4320,16,109,6)  | <i>DOT1 RAD9 MRC1 DDC1 SGS1 BRE1</i>                                        |
| GO:0008156 | negative regulation of DNA replication                                 | 1.10E-04 | 4.91E-03 | 14.41 (4320,11,109,4)  | <i>CSM3 RAD9 MRC1 CHD1</i>                                                  |
| GO:0031570 | DNA integrity checkpoint                                               | 6.20E-10 | 1.34E-07 | 14.15 (4320,28,109,10) | <i>CSM3 DOT1 BMH1 RAD9 RAD24 MRC1 DDC1 SGS1 BRE1 RAD17</i>                  |
| GO:0000726 | non-recombinational repair                                             | 4.53E-05 | 2.25E-03 | 11.66 (4320,17,109,5)  | <i>CSM3 RAD9 TEN1 BDF2 SRS2 MRC1 SGS1 RAD50 CHD1</i>                        |
| GO:0006312 | mitotic recombination                                                  | 1.30E-06 | 8.66E-05 | 11.56 (4320,24,109,7)  | <i>RAD52 SRS2 RSC8 RAD50 XRS2</i>                                           |
| GO:0051053 | negative regulation of DNA metabolic process                           | 3.77E-08 | 3.46E-06 | 11.51 (4320,31,109,9)  | <i>RAD52 IES5 RAD57 SGS1 BRE1 RAD50 NHP10</i>                               |
| GO:0031056 | regulation of histone modification                                     | 3.16E-04 | 1.23E-02 | 11.32 (4320,14,109,4)  | <i>RTF1 HIR3 ASF1 CHD1 ASF1 CHD1</i>                                        |
| GO:0006303 | double-strand break repair via nonhomologous end joining               | 4.22E-04 | 1.56E-02 | 10.57 (4320,15,109,4)  | <i>SRS2 RSC8 RAD50 XRS2</i>                                                 |
| GO:0000723 | telomere maintenance                                                   | 1.74E-10 | 5.79E-08 | 10.10 (4320,51,109,13) | <i>RAD52 IES5 TEN1 MRC1 RAD50 RIF1 RAD57 SGS1 BRE1 SWD3 NHP10 XRS2 SWD1</i> |
| GO:0060249 | anatomical structure homeostasis                                       | 1.74E-10 | 5.38E-08 | 10.10 (4320,51,109,13) | <i>RAD52 IES5 TEN1 MRC1 RAD50 RIF1 RAD57 SGS1 BRE1 SWD3 NHP10 XRS2 SWD1</i> |
| GO:0032200 | telomere organization                                                  | 2.28E-10 | 5.78E-08 | 9.91 (4320,52,109,13)  | <i>RAD52 IES5 TEN1 MRC1 RAD50 RIF1 RAD57 SGS1 BRE1 SWD3 NHP10 XRS2 SWD1</i> |
| GO:0000725 | recombinational repair                                                 | 1.05E-07 | 7.96E-06 | 8.81 (4320,45,109,10)  | <i>DOT1 RAD52 CTF18 CTF4 POL32 DDC1 SGS1 BRE1 RAD50 XRS2</i>                |
| GO:0007064 | mitotic sister chromatid cohesion                                      | 2.70E-04 | 1.08E-02 | 8.26 (4320,24,109,5)   | <i>CSM3 CTF18 CTF4 MRC1 CTF8</i>                                            |
| GO:0006289 | nucleotide-excision repair                                             | 6.65E-05 | 3.23E-03 | 8.20 (4320,29,109,6)   | <i>RTF1 DOT1 RAD9 RAD24 POL32 ELC1</i>                                      |
| GO:0006368 | transcription elongation from RNA polymerase II promoter               | 6.65E-05 | 3.19E-03 | 8.20 (4320,29,109,6)   | <i>RTF1 SPT2 HIR3 RSC8 HPC2 CHD1</i>                                        |
| GO:0000724 | double-strand break repair via homologous recombination                | 2.01E-05 | 1.11E-03 | 7.93 (4320,35,109,7)   | <i>RAD52 CTF18 CTF4 POL32 SGS1 BRE1 RAD50</i>                               |
| GO:0006302 | double-strand break repair                                             | 4.76E-08 | 4.11E-06 | 7.32 (4320,65,109,12)  | <i>RAD52 CTF18 CTF4 POL32 SRS2 SGS1 RSC8 BRE1 RAD50 RAD17 NHP10 XRS2</i>    |
| GO:0034728 | nucleosome organization                                                | 1.06E-05 | 6.16E-04 | 7.21 (4320,44,109,8)   | <i>SPN1 HIR3 ASF1 RSC8 HPC2 NHP10 SWC5 CHD1</i>                             |
| GO:0006354 | DNA-templated transcription, elongation                                | 1.43E-04 | 6.23E-03 | 7.21 (4320,33,109,6)   | <i>RTF1 SPT2 HIR3 RSC8 HPC2 CHD1</i>                                        |
| GO:0000075 | cell cycle checkpoint                                                  | 2.31E-07 | 1.66E-05 | 7.15 (4320,61,109,11)  | <i>CSM3 DOT1 BMH1 RAD9 RAD24 MRC1 DDC1 SGS1 BRE1 PPH21 RAD17</i>            |
| GO:0007093 | mitotic cell cycle checkpoint                                          | 1.49E-05 | 8.58E-04 | 6.89 (4320,46,109,8)   | <i>DOT1 BMH1 RAD9 MRC1 DDC1 SGS1 BRE1 PPH21</i>                             |
| GO:0034243 | regulation of transcription elongation from RNA polymerase II promoter | 6.83E-04 | 2.42E-02 | 6.83 (4320,29,109,5)   | <i>RTF1 CAF40 SPN1 ASF1 YKE2</i>                                            |

|            |                                                                         |          |          |                        |                                                                                                                                             |
|------------|-------------------------------------------------------------------------|----------|----------|------------------------|---------------------------------------------------------------------------------------------------------------------------------------------|
| GO:0032784 | regulation of DNA-templated transcription, elongation                   | 9.39E-04 | 3.21E-02 | 6.39 (4320,31,109,5)   | <i>RTF1 CAF40 SPN1 ASF1 YKE2</i>                                                                                                            |
| GO:0006348 | chromatin silencing at telomere                                         | 3.21E-04 | 1.24E-02 | 6.26 (4320,38,109,6)   | <i>DOT1 ASF1 MRC1 BRE1 SWD3 SWD1</i>                                                                                                        |
| GO:0006310 | DNA recombination                                                       | 4.11E-10 | 9.32E-08 | 6.05 (4320,118,109,18) | <i>DOT1 UPF3 RAD52 IES5 RAD24 POL32 CTF4 RAD50 RAD17 CTF18 RAD57 NMD2 DDC1 MMS4 SGS1 BRE1 NHP10 XRS2</i>                                    |
| GO:0045930 | negative regulation of mitotic cell cycle                               | 4.38E-05 | 2.20E-03 | 5.98 (4320,53,109,8)   | <i>DOT1 BMH1 RAD9 MRC1 DDC1 SGS1 BRE1 PPH21</i>                                                                                             |
| GO:0051052 | regulation of DNA metabolic process                                     | 1.16E-06 | 7.82E-05 | 5.53 (4320,86,109,12)  | <i>CSM3 RTF1 RAD9 TEN1 SRS2 BDF2 MRC1 SGS1 MMS4 BRE1 RAD50 CHD1</i>                                                                         |
| GO:0071824 | protein-DNA complex subunit organization                                | 3.06E-06 | 1.86E-04 | 5.06 (4320,94,109,12)  | <i>RAD52 SPN1 NCB2 HIR3 SRS2 ASF1 RAD57 RSC8 HPC2 NHP10 SWC5 CHD1</i>                                                                       |
| GO:0007346 | regulation of mitotic cell cycle                                        | 4.29E-06 | 2.57E-04 | 4.90 (4320,97,109,12)  | <i>DOT1 BMH1 RAD9 CIK1 CLA4 MRC1 DDC1 SGS1 SIS2 BRE1 PPH21 SMI1</i>                                                                         |
| GO:0006281 | DNA repair                                                              | 4.58E-11 | 1.98E-08 | 4.83 (4320,197,109,24) | <i>DOT1 RAD52 RAD24 POL32 CTF4 MRC1 RSC8 RAD50 RAD17 CSM3 RTF1 CTF18 RAD9 RRD1 SRS2 BDF2 RAD57 MMS4 SGS1 DDC1 BRE1 ELC1 NHP10 XRS2</i>      |
| GO:0045934 | negative regulation of nucleobase-containing compound metabolic process | 7.43E-10 | 1.53E-07 | 4.43 (4320,206,109,23) | <i>DOT1 BMH1 HIR3 NCB2 TEN1 MRC1 RAD50 CSM3 RTF1 SPT2 RAD9 HDA3 ASF1 BDF2 SRS2 RIF1 HTZ1 SGS1 SKO1 BRE1 SWD3 SWD1 CHD1</i>                  |
| GO:0051276 | chromosome organization                                                 | 1.12E-08 | 1.42E-06 | 4.43 (4320,179,109,20) | <i>RAD52 CIK1 IES5 CTF4 TEN1 MRC1 CTF8 RAD50 CSM3 CTF18 RIF1 SRS2 RAD57 MMS4 SGS1 BRE1 SWD3 NHP10 XRS2 SWD1</i>                             |
| GO:0051172 | negative regulation of nitrogen compound metabolic process              | 1.10E-09 | 2.15E-07 | 4.34 (4320,210,109,23) | <i>DOT1 BMH1 HIR3 NCB2 TEN1 MRC1 RAD50 CSM3 RTF1 SPT2 RAD9 HDA3 ASF1 SRS2 BDF2 RIF1 HTZ1 SGS1 SKO1 BRE1 SWD3 SWD1 CHD1</i>                  |
| GO:0006974 | cellular response to DNA damage stimulus                                | 2.10E-10 | 6.05E-08 | 4.31 (4320,230,109,25) | <i>DOT1 BMH1 RAD24 MRC1 RSC8 RAD50 RAD9 CTF18 SGS1 MMS4 ELC1 RAD52 CTF4 POL32 RAD17 RTF1 CSM3 RRD1 SRS2 BDF2 RAD57 DDC1 BRE1 NHP10 XRS2</i> |
| GO:0016458 | gene silencing                                                          | 2.26E-04 | 9.18E-03 | 4.25 (4320,84,109,9)   | <i>DOT1 HDA3 ASF1 RIF1 HTZ1 MRC1 BRE1 SWD3 SWD1</i>                                                                                         |
| GO:0016570 | histone modification                                                    | 5.26E-04 | 1.89E-02 | 4.23 (4320,75,109,8)   | <i>DOT1 RTF1 HDA3 ASF1 BRE1 SWD3 CHD1 SWD1</i>                                                                                              |
| GO:0016569 | covalent chromatin modification                                         | 5.26E-04 | 1.87E-02 | 4.23 (4320,75,109,8)   | <i>DOT1 RTF1 HDA3 ASF1 BRE1 SWD3 SWD1 CHD1</i>                                                                                              |
| GO:2000113 | negative regulation of cellular macromolecule biosynthetic process      | 1.84E-08 | 2.09E-06 | 4.10 (4320,203,109,21) | <i>DOT1 PAT1 BMH1 TIF5 NCB2 HIR3 MRC1 EAP1 CSM3 RTF1 SPT2 RAD9 HDA3 ASF1 RIF1 HTZ1 SKO1 BRE1 SWD3 SWD1 CHD1</i>                             |

|            |                                                           |          |          |                        |                                                                                                                                                                                |
|------------|-----------------------------------------------------------|----------|----------|------------------------|--------------------------------------------------------------------------------------------------------------------------------------------------------------------------------|
| GO:0010558 | negative regulation of macromolecule biosynthetic process | 2.01E-08 | 2.23E-06 | 4.08 (4320,204,109,21) | <i>DOT1 PAT1 BMH1 TIF5 NCB2 HIR3 MRC1 EAP1 CSM3 RTF1 SPT2 RAD9 HDA3 ASF1 RIF1 HTZ1 SKO1 BRE1 SWD3 SWD1 CHD1</i>                                                                |
| GO:0006259 | DNA metabolic process                                     | 2.86E-12 | 2.47E-09 | 3.98 (4320,319,109,32) | <i>DOT1 RAD24 MRC1 RSC8 RAD50 CTF18 RAD9 RIF1 NMD2 SGS1 MMS4 SWD3 ELC1 SWD1 UPF3 RAD52 IES5 POL32 CTF4 TEN1 CTF8 RAD17 CSM3 RTF1 RRD1 SRS2 BDF2 RAD57 DDC1 BRE1 NHP10 XRS2</i> |
| GO:0010605 | negative regulation of macromolecule metabolic process    | 9.29E-11 | 3.34E-08 | 3.98 (4320,279,109,28) | <i>PAT1 DOT1 BMH1 HIR3 MRC1 PPH21 RAD50 SPT2 RAD9 RIF1 ASF1 CLA4 HTZ1 SGS1 SKO1 SWD3 CHD1 SWD1 TIF5 NCB2 TEN1 EAP1 CSM3 RTF1 HDA3 SRS2 BDF2 BRE1</i>                           |
| GO:0045786 | negative regulation of cell cycle                         | 8.14E-04 | 2.83E-02 | 3.96 (4320,80,109,8)   | <i>DOT1 BMH1 RAD9 MRC1 DDC1 SGS1 BRE1 PPH21</i>                                                                                                                                |
| GO:0010629 | negative regulation of gene expression                    | 2.16E-07 | 1.58E-05 | 3.90 (4320,193,109,19) | <i>DOT1 PAT1 BMH1 TIF5 NCB2 HIR3 MRC1 EAP1 RTF1 SPT2 HDA3 ASF1 RIF1 CLA4 HTZ1 SKO1 BRE1 SWD3 SWD1</i>                                                                          |
| GO:0006342 | chromatin silencing                                       | 9.60E-04 | 3.26E-02 | 3.87 (4320,82,109,8)   | <i>DOT1 ASF1 RIF1 HTZ1 MRC1 BRE1 SWD3 SWD1</i>                                                                                                                                 |
| GO:0045814 | negative regulation of gene expression, epigenetic        | 9.60E-04 | 3.23E-02 | 3.87 (4320,82,109,8)   | <i>DOT1 ASF1 RIF1 HTZ1 MRC1 BRE1 SWD3 SWD1</i>                                                                                                                                 |
| GO:0009890 | negative regulation of biosynthetic process               | 8.32E-08 | 6.65E-06 | 3.77 (4320,221,109,21) | <i>DOT1 PAT1 BMH1 TIF5 NCB2 HIR3 MRC1 EAP1 CSM3 RTF1 SPT2 RAD9 HDA3 ASF1 RIF1 HTZ1 SKO1 BRE1 SWD3 SWD1 CHD1</i>                                                                |
| GO:0031327 | negative regulation of cellular biosynthetic process      | 8.32E-08 | 6.53E-06 | 3.77 (4320,221,109,21) | <i>DOT1 PAT1 BMH1 TIF5 NCB2 HIR3 MRC1 EAP1 CSM3 RTF1 SPT2 RAD9 HDA3 ASF1 RIF1 HTZ1 SKO1 BRE1 SWD3 SWD1 CHD1</i>                                                                |
| GO:0006325 | chromatin organization                                    | 2.14E-06 | 1.32E-04 | 3.70 (4320,182,109,17) | <i>DOT1 PAT1 SPN1 HIR3 RSC8 SWC5 SPT2 RTF1 HDA3 ASF1 HTZ1 BRE1 SWD3 HPC2 NHP10 CHD1 SWD1</i>                                                                                   |
| GO:0009892 | negative regulation of metabolic process                  | 3.29E-10 | 7.88E-08 | 3.65 (4320,315,109,29) | <i>PAT1 DOT1 BMH1 HIR3 MRC1 SIS2 PPH21 RAD50 SPT2 RAD9 RIF1 ASF1 CLA4 HTZ1 SGS1 SKO1 SWD3 CHD1 SWD1 TIF5 NCB2 TEN1 EAP1 CSM3 RTF1 HDA3 SRS2 BDF2 BRE1</i>                      |
| GO:0031324 | negative regulation of cellular metabolic process         | 3.50E-09 | 6.56E-07 | 3.52 (4320,304,109,27) | <i>PAT1 DOT1 BMH1 HIR3 MRC1 RAD50 PPH21 SPT2 RAD9 RIF1 ASF1 HTZ1 SGS1 SKO1 SWD3 CHD1 SWD1 TIF5 NCB2 TEN1 EAP1 CSM3 RTF1 HDA3 BDF2 SRS2 BRE1</i>                                |
| GO:0016568 | chromatin modification                                    | 8.32E-05 | 3.74E-03 | 3.43 (4320,150,109,13) | <i>DOT1 RSC8 SWC5 RTF1 HDA3 ASF1 HTZ1 BRE1 HPC2 SWD3 NHP10 SWD1 CHD1</i>                                                                                                       |
| GO:0045892 | negative regulation of transcription, DNA-templated       | 2.95E-05 | 1.57E-03 | 3.36 (4320,177,109,15) | <i>DOT1 BMH1 HIR3 NCB2 MRC1 SPT2 RTF1 HDA3 ASF1 RIF1 HTZ1 BRE1 SKO1 SWD3</i>                                                                                                   |

|            |                                                                |          |          |                        | SWD1                                                                                                                                                                                              |
|------------|----------------------------------------------------------------|----------|----------|------------------------|---------------------------------------------------------------------------------------------------------------------------------------------------------------------------------------------------|
| GO:0010564 | regulation of cell cycle process                               | 3.73E-04 | 1.40E-02 | 3.35 (4320,130,109,11) | <i>DOT1 BMH1 RAD9 CIK1 CLA4 MRC1 DDC1 SGS1 MMS4 BRE1 PPH21</i>                                                                                                                                    |
| GO:1902679 | negative regulation of RNA biosynthetic process                | 3.15E-05 | 1.66E-03 | 3.34 (4320,178,109,15) | <i>DOT1 BMH1 HIR3 NCB2 MRC1 SPT2 RTF1 HDA3 ASF1 RIF1 HTZ1 BRE1 SKO1 SWD3 SWD1</i>                                                                                                                 |
| GO:1903507 | negative regulation of nucleic acid-templated transcription    | 3.15E-05 | 1.64E-03 | 3.34 (4320,178,109,15) | <i>DOT1 BMH1 HIR3 NCB2 MRC1 SPT2 RTF1 HDA3 ASF1 RIF1 HTZ1 BRE1 SKO1 SWD3 SWD1</i>                                                                                                                 |
| GO:0051253 | negative regulation of RNA metabolic process                   | 3.15E-05 | 1.62E-03 | 3.34 (4320,178,109,15) | <i>DOT1 BMH1 HIR3 NCB2 MRC1 SPT2 RTF1 HDA3 ASF1 RIF1 HTZ1 BRE1 SKO1 SWD3 SWD1 SWD3 SWD1</i>                                                                                                       |
| GO:0051726 | regulation of cell cycle                                       | 3.72E-04 | 1.41E-02 | 2.96 (4320,174,109,13) | <i>DOT1 BMH1 CIK1 MRC1 SIS2 PPH21 RAD9 CLA4 MMS4 SGS1 DDC1 BRE1 SMI1</i>                                                                                                                          |
| GO:0048519 | negative regulation of biological process                      | 1.37E-08 | 1.68E-06 | 2.95 (4320,416,109,31) | <i>PAT1 DOT1 BMH1 HIR3 MRC1 SIS2 PPH21 RAD50 SPT2 RAD9 RIF1 ASF1 CLA4 HTZ1 SGS1 SKO1 SWD3 SWD1 CHD1 TIF5 NCB2 TEN1 EAP1 GPB2 RTF1 CSM3 HDA3 BDF2 SRS2 DDC1 BRE1</i>                               |
| GO:0048523 | negative regulation of cellular process                        | 6.85E-08 | 5.57E-06 | 2.90 (4320,396,109,29) | <i>PAT1 DOT1 BMH1 HIR3 MRC1 PPH21 RAD50 SPT2 RAD9 RIF1 ASF1 HTZ1 SGS1 SKO1 SWD3 CHD1 SWD1 TIF5 NCB2 TEN1 EAP1 GPB2 CSM3 RTF1 HDA3 BDF2 SRS2 DDC1 BRE1</i>                                         |
| GO:0033554 | cellular response to stress                                    | 2.42E-08 | 2.61E-06 | 2.88 (4320,426,109,31) | <i>DOT1 BMH1 UBA4 RAD24 MRC1 RSC8 RAD50 YKL069W RAD9 CTF18 ASF1 SGS1 MMS4 SKO1 ELC1 RAD52 NCB2 POL32 CTF4 RAD17 RTF1 CSM3 RRD1 BDF2 SRS2 RAD57 YPD1 DDC1 BRE1 NHP10 XRS2</i>                      |
| GO:0006950 | response to stress                                             | 5.11E-09 | 8.17E-07 | 2.79 (4320,497,109,35) | <i>DOT1 BMH1 UBA4 RAD24 MRC1 RSC8 SIS2 RAD50 YKL069W RAD9 CTF18 ASF1 MMS4 SGS1 SKO1 ELC1 RAD52 NCB2 RRD2 POL32 CTF4 NST1 RAD17 RTF1 CSM3 RRD1 TCO89 BDF2 SRS2 RAD57 YPD1 DDC1 BRE1 NHP10 XRS2</i> |
| GO:1903046 | meiotic cell cycle process                                     | 4.07E-04 | 1.52E-02 | 2.79 (4320,199,109,14) | <i>DOT1 BMH1 RAD52 RAD24 RAD50 RAD17 GPB2 CSM3 RAD57 SGS1 DDC1 MMS4 BRE1 XRS2</i>                                                                                                                 |
| GO:1903047 | mitotic cell cycle process                                     | 8.03E-05 | 3.69E-03 | 2.71 (4320,263,109,18) | <i>DOT1 BMH1 CIK1 HIR3 RRD2 CTF4 MRC1 RSC8 CTF8 PPH21 CSM3 CTF18 RAD9 RRD1 SGS1 DDC1 BRE1 HPC2</i>                                                                                                |
| GO:0019219 | regulation of nucleobase-containing compound metabolic process | 4.31E-09 | 7.16E-07 | 2.64 (4320,571,109,38) | <i>DOT1 BMH1 HIR3 MRC1 RSC8 RAD50 YKE2 SPT2 SOK2 RAD9 ELP6 RIF1 ASF1 HTZ1</i>                                                                                                                     |

|            |                                                           |          |          |                         |                                                                                                                                                                                                                                                                                                                                                              |
|------------|-----------------------------------------------------------|----------|----------|-------------------------|--------------------------------------------------------------------------------------------------------------------------------------------------------------------------------------------------------------------------------------------------------------------------------------------------------------------------------------------------------------|
|            |                                                           |          |          |                         | <i>MMS4 SGS1 SKO1 SWD3 SWD1 CHD1<br/>CAF40 RPB7 SPN1 NCB2 TEN1 SWC5 GPB2<br/>RTF1 CSM3 HDA3 RRD1 IMP2' BDF2 SRS2<br/>BRE1 HPC2 NHP10 SMI1</i>                                                                                                                                                                                                                |
| GO:0051716 | cellular response to stimulus                             | 2.41E-07 | 1.70E-05 | 2.61 (4320,470,109,31)  | <i>DOT1 BMH1 UBA4 RAD24 MRC1 RSC8<br/>RAD50 YKL069W RAD9 CTF18 ASF1 SGS1<br/>MMS4 SKO1 ELC1 RAD52 NCB2 POL32 CTF4<br/>RAD17 RTF1 CSM3 RRD1 BDF2 SRS2<br/>RAD57 YPD1 DDC1 BRE1 NHP10 XRS2</i>                                                                                                                                                                 |
| GO:0010468 | regulation of gene expression                             | 4.21E-09 | 7.57E-07 | 2.59 (4320,597,109,39)  | <i>DOT1 BMH1 HIR3 MRC1 RSC8 RAD50 YKE2<br/>SPT2 SOK2 RAD9 ELP6 RIF1 ASF1 HTZ1<br/>MMS4 SGS1 SKO1 SWD3 SWD1 CHD1<br/>CAF40 RPB7 SPN1 NCB2 TEN1 SWC5 GPB2<br/>RTF1 CSM3 HDA3 RRD1 IMP2' BDF2 SRS2<br/>BRE1 HPC2 NHP10 SMI1</i>                                                                                                                                 |
| GO:0051171 | regulation of nitrogen compound metabolic process         | 7.10E-09 | 1.06E-06 | 2.59 (4320,581,109,38)  | <i>PAT1 DOT1 RPS9B BMH1 HIR3 RPL31B<br/>MRC1 RSC8 PPH21 YKE2 SPT2 SOK2 RAD9<br/>ELP6 CLA4 RIF1 ASF1 HTZ1 SKO1 SWD3<br/>SWD1 CHD1 CAF40 RPB7 SPN1 TIF5 NCB2<br/>EAP1 SWC5 GPB2 RTF1 HDA3 RRD1 IMP2'<br/>BDF2 BRE1 HPC2 NHP10 SMI1</i>                                                                                                                         |
| GO:0033043 | regulation of organelle organization                      | 9.73E-04 | 3.25E-02 | 2.56 (4320,217,109,14)  | <i>DOT1 BMH1 CIK1 HIR3 TEN1 PPH21 RTF1<br/>ASF1 BDF2 CLA4 SGS1 DDC1 MMS4 CHD1<br/>PAT1 DOT1 RPS9B BMH1 HIR3 RPL31B<br/>MRC1 RSC8 PPH21 YKE2 SPT2 SOK2 RAD9<br/>ELP6 RIF1 ASF1 HTZ1 SKO1 SWD3 SWD1<br/>CHD1 CAF40 RPB7 SPN1 TIF5 NCB2 EAP1<br/>SWC5 GPB2 RTF1 CSM3 HDA3 RRD1 IMP2'<br/>BDF2 BRE1 HPC2 NHP10 SMI1</i>                                          |
| GO:2000112 | regulation of cellular macromolecule biosynthetic process | 7.91E-09 | 1.14E-06 | 2.53 (4320,610,109,39)  | <i>PAT1 DOT1 RPS9B BMH1 HIR3 RPL31B<br/>MRC1 RSC8 PPH21 YKE2 SPT2 SOK2 RAD9<br/>ELP6 RIF1 ASF1 HTZ1 SKO1 SWD3 SWD1<br/>CHD1 CAF40 RPB7 SPN1 TIF5 NCB2 EAP1<br/>SWC5 GPB2 RTF1 CSM3 HDA3 RRD1 IMP2'<br/>BDF2 BRE1 HPC2 NHP10 SMI1</i>                                                                                                                         |
| GO:0010556 | regulation of macromolecule biosynthetic process          | 9.56E-09 | 1.25E-06 | 2.52 (4320,614,109,39)  | <i>PAT1 DOT1 RPS9B BMH1 HIR3 RPL31B<br/>MRC1 RSC8 PPH21 YKE2 SPT2 SOK2 RAD9<br/>ELP6 RIF1 ASF1 HTZ1 SKO1 SWD3 SWD1<br/>CHD1 CAF40 RPB7 SPN1 TIF5 NCB2 EAP1<br/>SWC5 GPB2 RTF1 CSM3 HDA3 RRD1 IMP2'<br/>BDF2 BRE1 HPC2 NHP10 SMI1</i>                                                                                                                         |
| GO:0090304 | nucleic acid metabolic process                            | 6.12E-16 | 2.64E-12 | 2.47 (4320,1060,109,66) | <i>PAT1 RPS0B HIR3 MRC1 RSC8 TPT1 SOK2<br/>RAD9 ASF1 RIF1 NMD2 MMS4 SKO1 ELC1<br/>RAD52 CAF40 LSM7 NHP2 LSM6 CTF8<br/>SWC5 RTF1 HDA3 BUD21 RRD1 RAD57<br/>HPC2 SMI1 NHP10 XRS2 DOT1 RPS1B<br/>RPS9B UBA4 TRM11 RAD24 LEA1 RAD50<br/>SPT2 CTF18 ELP6 HTZ1 SGS1 SWD3 FRS2<br/>CHD1 SWD1 UPF3 RPB7 RPC11 SPN1 IES5<br/>NCB2 POL32 CTF4 TEN1 EAP1 RAD17 CSM3</i> |

|            |                                                    |          |          |                        |                                                                                                                                                                                                                                   |
|------------|----------------------------------------------------|----------|----------|------------------------|-----------------------------------------------------------------------------------------------------------------------------------------------------------------------------------------------------------------------------------|
|            |                                                    |          |          |                        | <i>RPS20 RTT10 SRS2 BDF2 DDC1 PUS7 BRE1</i>                                                                                                                                                                                       |
| GO:0009889 | regulation of biosynthetic process                 | 2.75E-08 | 2.83E-06 | 2.43 (4320,637,109,39) | <i>PAT1 DOT1 RPS9B BMH1 HIR3 RPL31B MRC1 RSC8 PPH21 YKE2 SPT2 SOK2 RAD9 ELP6 RIF1 ASF1 HTZ1 SKO1 SWD3 SWD1 CHD1 CAF40 RPB7 SPN1 TIF5 NCB2 EAP1 SWC5 GPB2 RTF1 CSM3 HDA3 RRD1 IMP2' BDF2 BRE1 HPC2 NHP10 SMI1</i>                  |
| GO:0031326 | regulation of cellular biosynthetic process        | 2.75E-08 | 2.76E-06 | 2.43 (4320,637,109,39) | <i>PAT1 DOT1 RPS9B BMH1 HIR3 RPL31B MRC1 RSC8 PPH21 YKE2 SPT2 SOK2 RAD9 ELP6 RIF1 ASF1 HTZ1 SKO1 SWD3 SWD1 CHD1 CAF40 RPB7 SPN1 TIF5 NCB2 EAP1 SWC5 GPB2 RTF1 CSM3 HDA3 RRD1 IMP2' BDF2 BRE1 HPC2 NHP10 SMI1</i>                  |
| GO:0051252 | regulation of RNA metabolic process                | 7.52E-07 | 5.15E-05 | 2.43 (4320,521,109,32) | <i>DOT1 BMH1 HIR3 MRC1 RSC8 YKE2 SPT2 SOK2 RAD9 ELP6 RIF1 ASF1 HTZ1 SKO1 SWD3 CHD1 SWD1 RPB7 CAF40 SPN1 NCB2 SWC5 GPB2 RTF1 HDA3 RRD1 IMP2' BDF2 BRE1 HPC2 NHP10 SMI1</i>                                                         |
| GO:0034645 | cellular macromolecule biosynthetic process        | 1.37E-08 | 1.65E-06 | 2.40 (4320,677,109,41) | <i>SUI2 RPS1B RPS0B DOT1 RPS9B BMH1 RPL14A HIR3 RPL31B MRC1 RSC8 SPT2 SOK2 CTF18 ELP6 ASF1 HTZ1 SGS1 SKO1 FRS2 CHD1 RAD52 CAF40 RPB7 RPC11 SPN1 TIF5 NCB2 POL32 CTF4 TEN1 CTF8 SWC5 RTF1 HDA3 RPS20 BDF2 BRE1 HPC2 SMI1 NHP10</i> |
| GO:0050896 | response to stimulus                               | 9.57E-08 | 7.37E-06 | 2.40 (4320,610,109,37) | <i>DOT1 BMH1 UBA4 RAD24 MRC1 RSC8 SIS2 RAD50 YKL069W RAD9 CTF18 YKL075C CLA4 ASF1 MMS4 SGS1 SKO1 ELC1 RAD52 NCB2 RRD2 POL32 CTF4 NST1 RAD17 RTF1 CSM3 RRD1 TCO89 BDF2 SRS2 RAD57 YPD1 DDC1 BRE1 NHP10 XRS2</i>                    |
| GO:2001141 | regulation of RNA biosynthetic process             | 1.64E-06 | 1.04E-04 | 2.40 (4320,512,109,31) | <i>DOT1 BMH1 HIR3 MRC1 RSC8 YKE2 SPT2 SOK2 RAD9 ELP6 RIF1 ASF1 HTZ1 SKO1 SWD3 CHD1 SWD1 CAF40 SPN1 NCB2 SWC5 GPB2 RTF1 HDA3 RRD1 IMP2' BDF2 BRE1 HPC2 NHP10 SMI1</i>                                                              |
| GO:1903506 | regulation of nucleic acid-templated transcription | 1.64E-06 | 1.02E-04 | 2.40 (4320,512,109,31) | <i>DOT1 BMH1 HIR3 MRC1 RSC8 YKE2 SPT2 SOK2 RAD9 ELP6 RIF1 ASF1 HTZ1 SKO1 SWD3 CHD1 SWD1 CAF40 SPN1 NCB2 SWC5 GPB2 RTF1 HDA3 RRD1 IMP2' BDF2 BRE1 HPC2 NHP10 SMI1</i>                                                              |
| GO:0006355 | regulation of transcription, DNA-templated         | 1.57E-06 | 1.01E-04 | 2.40 (4320,511,109,31) | <i>DOT1 BMH1 HIR3 MRC1 RSC8 YKE2 SPT2 SOK2 RAD9 ELP6 RIF1 ASF1 HTZ1 SKO1</i>                                                                                                                                                      |

|            |                                                             |          |          |      |                   |                                                                                                                                                                                                                                                            |
|------------|-------------------------------------------------------------|----------|----------|------|-------------------|------------------------------------------------------------------------------------------------------------------------------------------------------------------------------------------------------------------------------------------------------------|
|            |                                                             |          |          |      |                   | SWD3 CHD1 SWD1 CAF40 SPN1 NCB2<br>SWC5 GPB2 RTF1 HDA3 RRD1 IMP2' BDF2<br>BRE1 HPC2 NHP10 SMI1                                                                                                                                                              |
| GO:0009059 | macromolecule biosynthetic process                          | 3.00E-08 | 2.88E-06 | 2.34 | (4320,695,109,41) | PAT1 DOT1 RPS9B BMH1 HIR3 RPL31B<br>MRC1 RSC8 PPH21 RAD50 YKE2 SPT2<br>SOK2 RAD9 ELP6 CLA4 RIF1 ASF1 HTZ1<br>MMS4 SGS1 SKO1 SWD3 SWD1 CHD1<br>CAF40 RPB7 SPN1 TIF5 NCB2 TEN1 EAP1<br>SWC5 GPB2 RTF1 CSM3 HDA3 RRD1 IMP2'<br>BDF2 SRS2 BRE1 HPC2 NHP10 SMI1 |
| GO:0006351 | transcription, DNA-templated                                | 7.39E-05 | 3.46E-03 | 2.34 | (4320,389,109,23) | SUI2 RPS1B RPS0B DOT1 RPS9B BMH1<br>RPL14A HIR3 RPL31B MRC1 RSC8 SPT2<br>SOK2 CTF18 ELP6 ASF1 HTZ1 SGS1 SKO1<br>FRS2 CHD1 RAD52 CAF40 RPB7 RPC11<br>SPN1 TIF5 NCB2 POL32 CTF4 TEN1 CTF8<br>SWC5 RTF1 HDA3 RPS20 BDF2 BRE1 HPC2<br>SMI1 NHP10               |
| GO:0097659 | nucleic acid-templated transcription                        | 7.39E-05 | 3.43E-03 | 2.34 | (4320,389,109,23) | DOT1 CAF40 RPB7 RPC11 SPN1 HIR3 NCB2<br>RSC8 SWC5 SPT2 RTF1 SOK2 HDA3 ELP6<br>BDF2 ASF1 HTZ1 SKO1 BRE1 HPC2 SMI1<br>NHP10 CHD1                                                                                                                             |
| GO:0060255 | regulation of macromolecule metabolic process               | 4.27E-09 | 7.37E-07 | 2.33 | (4320,764,109,45) | DOT1 CAF40 RPB7 RPC11 SPN1 HIR3 NCB2<br>RSC8 SWC5 SPT2 RTF1 SOK2 HDA3 ELP6<br>BDF2 ASF1 HTZ1 SKO1 BRE1 HPC2 SMI1<br>NHP10 CHD1                                                                                                                             |
| GO:0006357 | regulation of transcription from RNA polymerase II promoter | 3.71E-04 | 1.42E-02 | 2.33 | (4320,323,109,19) | BMH1 CAF40 SPN1 NCB2 HIR3 YKE2 GPB2<br>RTF1 SPT2 HDA3 RAD9 RRD1 IMP2' ELP6<br>ASF1 HTZ1 SKO1 HPC2 CHD1                                                                                                                                                     |
| GO:0022402 | cell cycle process                                          | 3.21E-05 | 1.63E-03 | 2.30 | (4320,449,109,26) | DOT1 BMH1 GIK1 HIR3 RAD24 MRC1 RSC8<br>RAD50 PPH21 CTF18 RAD9 SGS1 MMS4<br>RAD52 RRD2 CTF4 CTF8 RAD17 GPB2<br>CSM3 RRD1 RAD57 DDC1 BRE1 HPC2 XRS2                                                                                                          |
| GO:0032774 | RNA biosynthetic process                                    | 1.38E-04 | 6.06E-03 | 2.25 | (4320,405,109,23) | DOT1 CAF40 RPB7 RPC11 SPN1 HIR3 NCB2<br>RSC8 SWC5 SPT2 RTF1 SOK2 HDA3 ELP6<br>BDF2 ASF1 HTZ1 SKO1 BRE1 HPC2 SMI1<br>NHP10 CHD1                                                                                                                             |
| GO:0080090 | regulation of primary metabolic process                     | 2.80E-08 | 2.74E-06 | 2.24 | (4320,780,109,44) | DOT1 PAT1 RPS9B BMH1 HIR3 RPL31B<br>MRC1 RSC8 RAD50 PPH21 YKE2 SPT2<br>SOK2 RAD9 ELP6 ASF1 RIF1 HTZ1 MMS4<br>SGS1 SKO1 SWD3 CHD1 SWD1 RPB7 CAF40<br>TIF5 SPN1 NCB2 TEN1 EAP1 SWC5 GPB2<br>CSM3 RTF1 HDA3 RRD1 IMP2' BDF2 SRS2<br>BRE1 HPC2 SMI1 NHP10      |



|            |                                                  |          |          |                         |                                                                                                                                                                                                                                                                                                                                                                                            |
|------------|--------------------------------------------------|----------|----------|-------------------------|--------------------------------------------------------------------------------------------------------------------------------------------------------------------------------------------------------------------------------------------------------------------------------------------------------------------------------------------------------------------------------------------|
| GO:0065008 | regulation of biological quality                 | 9.91E-04 | 3.29E-02 | 2.22 (4320,322,109,18)  | RPS9B RAD52 SPN1 IES5 RPL31B TEN1<br>MRC1 RAD50 TIM50 RIF1 RAD57 SGS1 BRE1<br>SWD3 NHP10 XRS2 CHD1 SWD1 SWD1                                                                                                                                                                                                                                                                               |
| GO:0031323 | regulation of cellular metabolic process         | 5.07E-08 | 4.29E-06 | 2.19 (4320,795,109,44)  | DOT1 PAT1 RPS9B BMH1 HIR3 RPL31B<br>MRC1 RSC8 RAD50 PPH21 YKE2 SPT2<br>SOK2 RAD9 ELP6 ASF1 RIF1 HTZ1 MMS4<br>SGS1 SKO1 SWD3 CHD1 SWD1 RPB7 CAF40<br>TIF5 SPN1 NCB2 TEN1 EAP1 SWC5 GPB2<br>CSM3 RTF1 HDA3 RRD1 IMP2' BDF2 SRS2<br>BRE1 HPC2 SMI1 NHP10                                                                                                                                      |
| GO:0043933 | macromolecular complex subunit organization      | 1.81E-05 | 1.02E-03 | 2.18 (4320,545,109,30)  | PAT1 RPS0B HIR3 MRC1 RSC8 SIS2 TPT1<br>SOK2 RAD9 ASF1 RIF1 NMD2 MMS4 SKO1<br>ELC1 RAD52 CAF40 LSM7 NHP2 LSM6 CTF8<br>SWC5 RTF1 HDA3 BUD21 RRD1 RAD57<br>HPC2 SMI1 NHP10 XRS2 DOT1 RPS1B<br>RPS9B UBA4 TRM11 RAD24 LEA1 RAD50<br>SPT2 CTF18 ELP6 HTZ1 SGS1 SWD3 FRS2<br>CHD1 SWD1 UPF3 RPB7 RPC11 SPN1 NCB2<br>IES5 POL32 CTF4 TEN1 EAP1 RAD17 CSM3<br>RPS20 RTT10 SRS2 BDF2 DDC1 PUS7 BRE1 |
| GO:0006139 | nucleobase-containing compound metabolic process | 2.17E-13 | 3.12E-10 | 2.18 (4320,1217,109,67) | RPS0B PAT1 DOT1 SUI2 CIK1 HIR3 RSC8<br>GIM4 PPH21 YKE2 SPT2 ASF1 HTZ1 SWD3<br>CHD1 SWD1 RAD52 SPN1 TIF5 NCB2 RRD2<br>SWC5 RTF1 HDA3 RRD1 SRS2 RAD57 BRE1<br>HPC2 NHP10                                                                                                                                                                                                                     |
| GO:0019222 | regulation of metabolic process                  | 3.42E-08 | 3.20E-06 | 2.13 (4320,875,109,47)  | DOT1 PAT1 RPS9B BMH1 HIR3 RPL31B<br>MRC1 RSC8 SIS2 RAD50 PPH21 YKE2 SPT2<br>SOK2 RAD9 ELP6 ASF1 RIF1 CLA4 HTZ1<br>MMS4 SGS1 SKO1 SWD3 CHD1 SWD1 RPB7<br>CAF40 TIF5 SPN1 NCB2 RRD2 TEN1 EAP1<br>SWC5 GPB2 CSM3 RTF1 HDA3 RRD1 IMP2'<br>BDF2 SRS2 BRE1 HPC2 NHP10 SMI1                                                                                                                       |
| GO:1902589 | single-organism organelle organization           | 2.78E-05 | 1.50E-03 | 2.13 (4320,557,109,30)  | DOT1 CIK1 MRC1 RSC8 RAD50 TIM50 ATG3<br>CTF18 RIF1 ASF1 SGS1 SWD3 SWD1 CHD1<br>RAD52 SPN1 IES5 RRD2 CTF4 TEN1 CTF8<br>TIM10 RTF1 CSM3 HDA3 RRD1 RAD57 BRE1<br>NHP10 XRS2                                                                                                                                                                                                                   |
| GO:0006725 | cellular aromatic compound metabolic process     | 2.89E-12 | 2.08E-09 | 2.08 (4320,1279,109,67) | PAT1 RPS0B HIR3 MRC1 RSC8 SIS2 TPT1<br>SOK2 RAD9 ASF1 RIF1 NMD2 MMS4 SKO1<br>ELC1 RAD52 CAF40 LSM7 NHP2 LSM6 CTF8<br>SWC5 RTF1 HDA3 BUD21 RRD1 RAD57<br>HPC2 SMI1 NHP10 XRS2 DOT1 RPS1B<br>RPS9B UBA4 TRM11 RAD24 LEA1 RAD50<br>SPT2 CTF18 ELP6 HTZ1 SGS1 SWD3 FRS2                                                                                                                        |

|            |                                                     |          |          |                         |                                                                                                                                                                                                                                                                                                                                                                                                    |
|------------|-----------------------------------------------------|----------|----------|-------------------------|----------------------------------------------------------------------------------------------------------------------------------------------------------------------------------------------------------------------------------------------------------------------------------------------------------------------------------------------------------------------------------------------------|
|            |                                                     |          |          |                         | CHD1 SWD1 UPF3 RPB7 RPC11 SPN1 IES5<br>NCB2 POL32 CTF4 TEN1 EAP1 RAD17 CSM3<br>RPS20 RTT10 SRS2 BDF2 DDC1 PUS7 BRE1                                                                                                                                                                                                                                                                                |
| GO:0046483 | heterocycle metabolic process                       | 3.53E-12 | 2.18E-09 | 2.07 (4320,1284,109,67) | PAT1 RPS0B HIR3 MRC1 RSC8 SIS2 TPT1<br>SOK2 RAD9 ASF1 RIF1 NMD2 MMS4 SKO1<br>ELC1 RAD52 CAF40 LSM7 NHP2 LSM6 CTF8<br>SWC5 RTF1 HDA3 BUD21 RRD1 RAD57<br>HPC2 SMI1 NHP10 XRS2 DOT1 RPS1B<br>RPS9B UBA4 TRM11 RAD24 LEA1 RAD50<br>SPT2 CTF18 ELP6 HTZ1 SGS1 SWD3 FRS2<br>CHD1 SWD1 UPF3 RPB7 RPC11 SPN1 NCB2<br>IES5 POL32 CTF4 TEN1 EAP1 RAD17 CSM3<br>RPS20 RTT10 SRS2 BDF2 DDC1 PUS7 BRE1         |
| GO:0016070 | RNA metabolic process                               | 5.41E-07 | 3.76E-05 | 2.06 (4320,829,109,43)  | DOT1 RPS0B RPS1B PAT1 RPS9B UBA4<br>TRM11 HIR3 LEA1 RSC8 TPT1 SPT2 SOK2<br>ELP6 ASF1 HTZ1 NMD2 SKO1 FRS2 CHD1<br>UPF3 RPB7 RPC11 CAF40 SPN1 NCB2 LSM7<br>NHP2 POL32 LSM6 EAP1 SWC5 RTF1 HDA3<br>BUD21 RPS20 RTT10 BDF2 PUS7 BRE1<br>HPC2 SMI1 NHP10                                                                                                                                                |
| GO:0034654 | nucleobase-containing compound biosynthetic process | 2.68E-04 | 1.08E-02 | 2.02 (4320,509,109,26)  | DOT1 HIR3 RSC8 SIS2 SPT2 SOK2 ELP6<br>ASF1 HTZ1 SKO1 CHD1 RAD52 RPC11 RPB7<br>CAF40 SPN1 NCB2 POL32 SWC5 RTF1 HDA3<br>BDF2 BRE1 HPC2 NHP10 SMI1                                                                                                                                                                                                                                                    |
| GO:0034641 | cellular nitrogen compound metabolic process        | 7.55E-12 | 4.07E-09 | 2.01 (4320,1338,109,68) | PAT1 RPS0B HIR3 MRC1 RSC8 SIS2 TPT1<br>SOK2 RAD9 ASF1 RIF1 NMD2 MMS4 SKO1<br>ELC1 RAD52 CAF40 LSM7 NHP2 LSM6 CTF8<br>SWC5 RTF1 HDA3 BUD21 RRD1 RAD57<br>HPC2 SMI1 NHP10 XRS2 DOT1 RPS1B<br>RPS9B UBA4 TRM11 RAD24 LEA1 RAD50<br>SPT2 CTF18 ELP6 HTZ1 SGS1 SWD3 FRS2<br>CHD1 SWD1 UPF3 RPB7 RPC11 SPN1 NCB2<br>IES5 POL32 CTF4 TEN1 EAP1 RAD17 CSM3<br>RPS20 RTT10 SRS2 BDF2 DDC1 PUS7 BRE1<br>SPE1 |
| GO:1901360 | organic cyclic compound metabolic process           | 1.97E-11 | 9.42E-09 | 2.00 (4320,1328,109,67) | PAT1 RPS0B HIR3 MRC1 RSC8 SIS2 TPT1<br>SOK2 RAD9 ASF1 RIF1 NMD2 MMS4 SKO1<br>ELC1 RAD52 CAF40 LSM7 NHP2 LSM6 CTF8<br>SWC5 RTF1 HDA3 BUD21 RRD1 RAD57<br>HPC2 SMI1 NHP10 XRS2 DOT1 RPS1B<br>RPS9B UBA4 TRM11 RAD24 LEA1 RAD50<br>SPT2 CTF18 ELP6 HTZ1 SGS1 SWD3 FRS2<br>CHD1 SWD1 UPF3 RPB7 RPC11 SPN1 NCB2<br>IES5 POL32 CTF4 TEN1 EAP1 RAD17 CSM3                                                 |

|            |                                          |          |          |                         |                                                                                                                                                                                                                                                                                                                                                                                                                               |
|------------|------------------------------------------|----------|----------|-------------------------|-------------------------------------------------------------------------------------------------------------------------------------------------------------------------------------------------------------------------------------------------------------------------------------------------------------------------------------------------------------------------------------------------------------------------------|
|            |                                          |          |          |                         | <i>RPS20 RTT10 SRS2 BDF2 DDC1 PUS7 BRE1</i>                                                                                                                                                                                                                                                                                                                                                                                   |
| GO:0050794 | regulation of cellular process           | 1.43E-08 | 1.67E-06 | 1.97 (4320,1104,109,55) | <i>PAT1 HIR3 MRC1 RSC8 SIS2 YKE2 SOK2<br/>RAD9 CLA4 RIF1 ASF1 MMS4 SKO1 CAF40<br/>TIF5 SWC5 RTF1 HDA3 RRD1 IMP2' SOK1<br/>HPC2 SMI1 NHP10 DOT1 RPS9B BMH1 CIK1<br/>UBA4 RPL31B YPT6 RAD50 PPH21 SPT2<br/>ELP6 HTZ1 SGS1 SWD3 TPK3 SWD1 CHD1<br/>RPB7 SPN1 NCB2 TEN1 EAP1 GPB2 CSM3<br/>MF(ALPHA)1 TCO89 SRS2 BDF2 DDC1 YPD1<br/>BRE1</i>                                                                                      |
| GO:0006996 | organelle organization                   | 1.82E-05 | 1.02E-03 | 1.95 (4320,752,109,37)  | <i>PAT1 DOT1 CIK1 MRC1 RSC8 RAD50 TIM50<br/>ATG3 CTF18 CLA4 RIF1 ASF1 MMS4 SGS1<br/>SWD3 TPK3 SWD1 CHD1 RAD52 SPN1 TIF5<br/>IES5 RRD2 CTF4 TEN1 CTF8 TIM10 RTF1<br/>CSM3 HDA3 RRD1 SRS2 RAD57 DDC1 BRE1<br/>NHP10 XRS2</i>                                                                                                                                                                                                    |
| GO:0006807 | nitrogen compound metabolic process      | 5.14E-11 | 2.01E-08 | 1.90 (4320,1461,109,70) | <i>PAT1 RPS0B HIR3 MRC1 RSC8 SIS2 TPT1<br/>SOK2 RAD9 ASF1 RIF1 NMD2 MMS4 SKO1<br/>ELC1 RAD52 CAF40 LSM7 NHP2 LSM6 CTF8<br/>SWC5 RTF1 HDA3 BUD21 RRD1 RAD57<br/>HPC2 SMI1 NHP10 XRS2 DOT1 RPS1B<br/>RPS9B BMH1 UBA4 TRM11 RAD24 LEA1<br/>RAD50 SPT2 CTF18 ELP6 HTZ1 SGS1 SWD3<br/>FRS2 ALT1 CHD1 SWD1 UPF3 RPB7 RPC11<br/>SPN1 IES5 NCB2 POL32 CTF4 TEN1 EAP1<br/>RAD17 CSM3 RPS20 RTT10 SRS2 BDF2<br/>DDC1 PUS7 BRE1 SPE1</i> |
| GO:0050789 | regulation of biological process         | 4.61E-08 | 4.06E-06 | 1.89 (4320,1172,109,56) | <i>PAT1 HIR3 MRC1 RSC8 SIS2 YKE2 SOK2<br/>RAD9 CLA4 RIF1 ASF1 MMS4 SKO1 CAF40<br/>TIF5 SWC5 RTF1 HDA3 RRD1 IMP2' SOK1<br/>HPC2 SMI1 NHP10 DOT1 RPS9B BMH1 UBA4<br/>CIK1 RPL31B YPT6 RAD50 PPH21 SPT2<br/>ELP6 HTZ1 SGS1 SWD3 TPK3 SWD1 CHD1<br/>RPB7 SPN1 NCB2 RRD2 TEN1 EAP1 GPB2<br/>CSM3 MF(ALPHA)1 TCO89 SRS2 BDF2 DDC1<br/>YPD1 BRE1</i>                                                                                 |
| GO:0044260 | cellular macromolecule metabolic process | 1.10E-13 | 2.38E-10 | 1.85 (4320,1754,109,82) | <i>SUI2 PAT1 RPS0B HIR3 STI1 MRC1 GIM4<br/>RSC8 YKE2 TPT1 SOK2 RAD9 ASF1 RIF1<br/>CLA4 NMD2 MMS4 SKO1 ELC1 RAD52<br/>CAF40 TIF5 LSM7 PBY1 NHP2 LSM6 SHR3<br/>CTF8 SWC5 RTF1 HDA3 BUD21 RRD1<br/>RAD57 HPC2 SMI1 NHP10 XRS2 RPS1B<br/>DOT1 RPS9B BMH1 RPL14A UBA4 TRM11<br/>RAD24 RPL31B LEA1 RAD50 PPH21 SPT2</i>                                                                                                             |

|            |                                                 |          |          |      |                    |                                                                                                                                                                                                                                                                                                                                                                                                                                                                                     |
|------------|-------------------------------------------------|----------|----------|------|--------------------|-------------------------------------------------------------------------------------------------------------------------------------------------------------------------------------------------------------------------------------------------------------------------------------------------------------------------------------------------------------------------------------------------------------------------------------------------------------------------------------|
|            |                                                 |          |          |      |                    | ATG3 CTF18 ELP6 HTZ1 SGS1 TPK3 SWD3<br>FRS2 CHD1 SWD1 UPF3 RPC11 RPB7 SPN1<br>NCB2 IES5 RRD2 POL32 CTF4 TEN1 VMS1<br>EAP1 RAD17 CSM3 RPS20 RTT10 SRS2<br>BDF2 DDC1 PUS7 BRE1                                                                                                                                                                                                                                                                                                        |
| GO:0044271 | cellular nitrogen compound biosynthetic process | 9.15E-04 | 3.16E-02 | 1.84 | (4320,581,109,27)  | DOT1 HIR3 RSC8 SIS2 SPT2 SOK2 ELP6<br>ASF1 HTZ1 SKO1 CHD1 RAD52 RPC11 RPB7<br>CAF40 SPN1 NCB2 POL32 SWC5 RTF1 HDA3<br>BDF2 BRE1 HPC2 NHP10 SMI1 SPE1                                                                                                                                                                                                                                                                                                                                |
| GO:0065007 | biological regulation                           | 2.73E-08 | 2.87E-06 | 1.82 | (4320,1327,109,61) | PAT1 HIR3 MRC1 RSC8 SIS2 YKE2 TIM50<br>SOK2 RAD9 CLA4 ASF1 RIF1 MMS4 SKO1<br>RAD52 CAF40 TIF5 SWC5 RTF1 HDA3 RRD1<br>IMP2' SOK1 RAD57 HPC2 SMI1 NHP10 XRS2<br>DOT1 RPS9B BMH1 UBA4 CIK1 RPL31B<br>YPT6 RAD50 PPH21 SPT2 ELP6 HTZ1 SGS1<br>SWD3 TPK3 CHD1 SWD1 RPB7 SPN1 IES5<br>NCB2 RRD2 TEN1 EAP1 GPB2 CSM3<br>MF(ALPHA)1 TCO89 SRS2 BDF2 DDC1 YPD1<br>BRE1                                                                                                                       |
| GO:0043170 | macromolecule metabolic process                 | 2.02E-12 | 2.17E-09 | 1.77 | (4320,1834,109,82) | SUI2 PAT1 RPS0B HIR3 STI1 MRC1 GIM4<br>RSC8 YKE2 TPT1 SOK2 RAD9 ASF1 RIF1<br>CLA4 NMD2 MMS4 SKO1 ELC1 RAD52<br>CAF40 TIF5 LSM7 PBY1 NHP2 LSM6 SHR3<br>CTF8 SWC5 RTF1 HDA3 BUD21 RRD1<br>RAD57 HPC2 SMI1 NHP10 XRS2 RPS1B<br>DOT1 RPS9B BMH1 RPL14A UBA4 TRM11<br>RAD24 RPL31B LEA1 RAD50 PPH21 SPT2<br>ATG3 CTF18 ELP6 HTZ1 SGS1 TPK3 SWD3<br>FRS2 CHD1 SWD1 UPF3 RPC11 RPB7 SPN1<br>NCB2 IES5 RRD2 POL32 CTF4 TEN1 VMS1<br>EAP1 RAD17 CSM3 RPS20 RTT10 SRS2<br>BDF2 DDC1 PUS7 BRE1 |
| GO:0044249 | cellular biosynthetic process                   | 6.91E-05 | 3.27E-03 | 1.70 | (4320,1025,109,44) | DOT1 RPS0B RPS1B SUI2 RPS9B BMH1<br>RPL14A HIR3 RPL31B MRC1 RSC8 SIS2<br>SPT2 SOK2 CTF18 ELP6 ASF1 HTZ1 SGS1<br>SKO1 FRS2 ALT1 CHD1 RAD52 RPB7 RPC11<br>CAF40 TIF5 SPN1 NCB2 CTF4 POL32 TEN1<br>CTF8 SWC5 RTF1 HDA3 RPS20 BDF2 BRE1<br>HPC2 SMI1 SPE1 NHP10                                                                                                                                                                                                                         |
| GO:1901576 | organic substance biosynthetic process          | 1.64E-04 | 6.74E-03 | 1.64 | (4320,1061,109,44) | DOT1 RPS0B RPS1B SUI2 RPS9B BMH1<br>RPL14A HIR3 RPL31B MRC1 RSC8 SIS2<br>SPT2 SOK2 CTF18 ELP6 ASF1 HTZ1 SGS1<br>SKO1 FRS2 ALT1 CHD1 RAD52 RPB7 RPC11<br>CAF40 TIF5 SPN1 NCB2 CTF4 POL32 TEN1                                                                                                                                                                                                                                                                                        |

|            |                                               |          |          |                         |                                                                                                                                                                                                                                                                                                                                                                                                                                                                                                                   |
|------------|-----------------------------------------------|----------|----------|-------------------------|-------------------------------------------------------------------------------------------------------------------------------------------------------------------------------------------------------------------------------------------------------------------------------------------------------------------------------------------------------------------------------------------------------------------------------------------------------------------------------------------------------------------|
|            |                                               |          |          |                         | CTF8 SWC5 RTF1 HDA3 RPS20 BDF2 BRE1<br>HPC2 SMI1 SPE1 NHP10                                                                                                                                                                                                                                                                                                                                                                                                                                                       |
| GO:0009058 | biosynthetic process                          | 2.89E-04 | 1.14E-02 | 1.61 (4320,1086,109,44) | DOT1 RPS0B RPS1B SUI2 RPS9B BMH1<br>RPL14A HIR3 RPL31B MRC1 RSC8 SIS2<br>SPT2 SOK2 CTF18 ELP6 ASF1 HTZ1 SGS1<br>SKO1 FRS2 ALT1 CHD1 RAD52 RPB7 RPC11<br>CAF40 TIF5 SPN1 NCB2 CTF4 POL32 TEN1<br>CTF8 SWC5 RTF1 HDA3 RPS20 BDF2 BRE1<br>HPC2 SMI1 SPE1 NHP10                                                                                                                                                                                                                                                       |
| GO:0071840 | cellular component organization or biogenesis | 2.05E-05 | 1.12E-03 | 1.58 (4320,1427,109,57) | PAT1 RPS0B SUI2 HIR3 MRC1 GIM4 RSC8<br>YKE2 TIM50 RE1 CLA4 ASF1 RIF1 MMS4<br>RAD52 TIF5 NHP2 CTF8 SWC5 APQ12 RTF1<br>HDA3 BUD21 RRD1 RAD57 HPC2 SMI1<br>NHP10 XRS2 DOT1 RPS9B BMH1 CIK1<br>RAD50 PPH21 ATG3 SPT2 CTF18 HTZ1<br>SGS1 SWD3 TPK3 SWD1 CHD1 SPN1 IES5<br>NCB2 RRD2 CTF4 TEN1 TIM10 CSM3 TCO89<br>SRS2 DDC1 BRE1 PUS7                                                                                                                                                                                  |
| GO:0016043 | cellular component organization               | 8.31E-05 | 3.77E-03 | 1.57 (4320,1309,109,52) | SUI2 PAT1 RPS0B HIR3 MRC1 RSC8 GIM4<br>YKE2 TIM50 CLA4 ASF1 RIF1 MMS4 RAD52<br>TIF5 CTF8 APQ12 SWC5 RTF1 HDA3 RRD1<br>RAD57 HPC2 SMI1 NHP10 XRS2 DOT1 BMH1<br>CIK1 RAD50 PPH21 ATG3 SPT2 CTF18 HTZ1<br>SGS1 SWD3 TPK3 SWD1 CHD1 SPN1 NCB2<br>IES5 RRD2 CTF4 TEN1 TIM10 CSM3 TCO89<br>SRS2 DDC1 BRE1                                                                                                                                                                                                               |
| GO:0044238 | primary metabolic process                     | 8.69E-09 | 1.21E-06 | 1.48 (4320,2322,109,87) | SUI2 PAT1 RPS0B HIR3 STI1 MRC1 SIS2<br>GIM4 RSC8 YKE2 TPT1 SOK2 RAD9 ASF1<br>RIF1 CLA4 NMD2 MMS4 SKO1 ELC1 RAD52<br>CAF40 TIF5 LSM7 PBY1 NHP2 LSM6 SHR3<br>CTF8 APQ12 SWC5 RTF1 HDA3 BUD21<br>RRD1 RAD57 HPC2 SMI1 NHP10 XRS2<br>RPS1B DOT1 RPS9B BMH1 RPL14A UBA4<br>TRM11 RAD24 RPL31B LEA1 RAD50 PPH21<br>SPT2 ATG3 CTF18 ELP6 HTZ1 SGS1 TPK3<br>SWD3 FRS2 ALT1 CHD1 SWD1 UPF3 RPC11<br>RPB7 SPN1 NCB2 IES5 RRD2 POL32 CTF4<br>TEN1 VMS1 EAP1 RAD17 CSM3 RPS20<br>RTT10 TCO89 SRS2 BDF2 DDC1 PUS7 BRE1<br>SPE1 |
| GO:0044237 | cellular metabolic process                    | 9.48E-09 | 1.28E-06 | 1.46 (4320,2418,109,89) | SUI2 PAT1 RPS0B HIR3 STI1 MRC1 SIS2<br>GIM4 RSC8 YKE2 TPT1 SOK2 RAD9 ASF1<br>RIF1 CLA4 NMD2 MMS4 SKO1 ELC1 RAD52<br>CAF40 TIF5 LSM7 PBY1 NHP2 LSM6 SHR3                                                                                                                                                                                                                                                                                                                                                           |

|            |                                     |          |          |                         |                                                                                                                                                                                                                                                                                                                                                                                                                                                                                                                                                                      |
|------------|-------------------------------------|----------|----------|-------------------------|----------------------------------------------------------------------------------------------------------------------------------------------------------------------------------------------------------------------------------------------------------------------------------------------------------------------------------------------------------------------------------------------------------------------------------------------------------------------------------------------------------------------------------------------------------------------|
|            |                                     |          |          |                         | <p>CTF8 APQ12 SWC5 RTF1 HDA3 BUD21<br/> RRD1 RAD57 HPC2 SMI1 NHP10 XRS2<br/> RPS1B DOT1 RPS9B BMH1 RPL14A UBA4<br/> TRM11 RAD24 RPL31B LEA1 RAD50 PPH21<br/> SPT2 ATG3 CTF18 ELP6 HTZ1 SGS1 TPK3<br/> SWD3 FRS2 ALT1 CHD1 SWD1 UPF3 RPB7<br/> RPC11 SPN1 IES5 NCB2 RRD2 POL32 CTF4<br/> TEN1 VMS1 EAP1 PET20 RAD17 CSM3<br/> RPS20 RTT10 TCO89 SRS2 IPP1 BDF2 DDC1<br/> PUS7 BRE1 SPE1</p>                                                                                                                                                                           |
| GO:0071704 | organic substance metabolic process | 1.28E-07 | 9.51E-06 | 1.42 (4320,2424,109,87) | <p>SUI2 PAT1 RPS0B HIR3 STI1 MRC1 SIS2<br/> GIM4 RSC8 YKE2 TPT1 SOK2 RAD9 ASF1<br/> RIF1 CLA4 NMD2 MMS4 SKO1 ELC1 RAD52<br/> CAF40 TIF5 LSM7 PB1 NHP2 LSM6 SHR3<br/> CTF8 APQ12 SWC5 RTF1 HDA3 BUD21<br/> RRD1 RAD57 HPC2 SMI1 NHP10 XRS2<br/> RPS1B DOT1 RPS9B BMH1 RPL14A UBA4<br/> TRM11 RAD24 RPL31B LEA1 RAD50 PPH21<br/> SPT2 ATG3 CTF18 ELP6 HTZ1 SGS1 TPK3<br/> SWD3 FRS2 ALT1 CHD1 SWD1 UPF3 RPC11<br/> RPB7 SPN1 NCB2 IES5 RRD2 POL32 CTF4<br/> TEN1 VMS1 EAP1 RAD17 CSM3 RPS20<br/> RTT10 TCO89 SRS2 BDF2 DDC1 PUS7 BRE1<br/> SPE1</p>                    |
| GO:0008152 | metabolic process                   | 4.75E-06 | 2.81E-04 | 1.31 (4320,2717,109,90) | <p>SUI2 PAT1 RPS0B HIR3 STI1 MRC1 SIS2<br/> GIM4 RSC8 YKL069W YKE2 TPT1 SOK2<br/> RAD9 ASF1 RIF1 CLA4 NMD2 MMS4 SKO1<br/> ELC1 RAD52 CAF40 TIF5 LSM7 PB1 NHP2<br/> LSM6 SHR3 CTF8 APQ12 SWC5 RTF1 HDA3<br/> BUD21 RRD1 RAD57 HPC2 SMI1 NHP10<br/> XRS2 RPS1B DOT1 RPS9B BMH1 RPL14A<br/> UBA4 TRM11 RAD24 RPL31B LEA1 RAD50<br/> PPH21 SPT2 ATG3 CTF18 ELP6 HTZ1 SGS1<br/> TPK3 SWD3 FRS2 ALT1 CHD1 SWD1 UPF3<br/> RPB7 RPC11 SPN1 NCB2 IES5 RRD2 POL32<br/> CTF4 TEN1 VMS1 EAP1 PET20 RAD17 CSM3<br/> RPS20 RTT10 TCO89 SRS2 IPP1 BDF2 DDC1<br/> PUS7 BRE1 SPE1</p> |

## Cellular components

| GO term    | Description                       | P-value  | FDR q-value | Enrichment (N, B, n, b) | Genes                                                                                                                                                                                                                                                                                                                                                                                       |
|------------|-----------------------------------|----------|-------------|-------------------------|---------------------------------------------------------------------------------------------------------------------------------------------------------------------------------------------------------------------------------------------------------------------------------------------------------------------------------------------------------------------------------------------|
| GO:0030870 | Mre11 complex                     | 6.31E-04 | 6.03E-02    | 39.63 (4320,2,109,2)    | <i>RAD50 XRS2</i>                                                                                                                                                                                                                                                                                                                                                                           |
| GO:0030896 | checkpoint clamp complex          | 6.31E-04 | 5.43E-02    | 39.63 (4320,2,109,2)    | <i>DDC1 RAD17</i>                                                                                                                                                                                                                                                                                                                                                                           |
| GO:0022627 | cytosolic small ribosomal subunit | 3.21E-04 | 3.46E-02    | 6.26 (4320,38,109,6)    | <i>RPS1B PAT1 RPS0B RPS9B TIF5 RPS20</i>                                                                                                                                                                                                                                                                                                                                                    |
| GO:0044427 | chromosomal part                  | 2.80E-08 | 8.02E-06    | 3.42 (4320,290,109,25)  | <i>PAT1 RAD24 MRC1 RAD9 CTF18 RIF1 HTZ1 SGS1 SWD3 CHD1 SWD1 IES5 CTF4 POL32 TEN1 CTF8 RAD17 SWC5 RTF1 CSM3 HDA3 RRD1 DDC1 BRE1 NHP10</i>                                                                                                                                                                                                                                                    |
| GO:0044454 | nuclear chromosome part           | 1.82E-05 | 3.13E-03    | 3.16 (4320,213,109,17)  | <i>IES5 POL32 CTF4 TEN1 MRC1 RAD17 SWC5 CSM3 CTF18 HDA3 RRD1 RIF1 HTZ1 DDC1 BRE1 NHP10 CHD1</i>                                                                                                                                                                                                                                                                                             |
| GO:0044428 | nuclear part                      | 3.94E-05 | 5.65E-03    | 1.86 (4320,809,109,38)  | <i>RPS9B MRC1 LEA1 RSC8 RAD50 CTF18 RIF1 HTZ1 SGS1 SWD3 ELC1 CHD1 SWD1 UPF3 RAD52 RPB7 RPC11 IES5 NCB2 LSM7 NHP2 POL32 CTF4 LSM6 TEN1 RAD17 SWC5 APQ12 CSM3 RTF1 HDA3 BUD21 RRD1 RAD57 DDC1 BRE1 NHP10 XRS2</i>                                                                                                                                                                             |
| GO:0032991 | macromolecular complex            | 2.47E-10 | 2.12E-07    | 1.84 (4320,1506,109,70) | <i>PAT1 RPS0B SUI2 HIR3 MRC1 GIM4 RSC8 SIS2 YKE2 TIM50 REI1 RAD9 RIF1 NMD2 MMS4 ELC1 MTC1 CAF40 TIF5 LSM7 PBY1 NHP2 LSM6 CTF8 SWC5 RTF1 HDA3 BUD21 RRD1 RAD57 HPC2 NHP10 XRS2 RPS1B RPS9B RPL14A CIK1 TRM11 RAD24 RPL31B LEA1 RAD50 PPH21 CTF18 ELP6 HTZ1 SGS1 SWD3 FRS2 TPK3 CHD1 SWD1 UPF3 RPB7 RPC11 NCB2 IES5 RRD2 POL32 CTF4 TEN1 VMS1 EAP1 RAD17 TIM10 CSM3 RPS20 TCO89 DDC1 BRE1</i> |
| GO:0043234 | protein complex                   | 9.88E-06 | 2.12E-03    | 1.75 (4320,1084,109,48) | <i>PAT1 SUI2 CIK1 TRM11 HIR3 RAD24 MRC1 GIM4 RSC8 SIS2 RAD50 PPH21 YKE2 TIM50 CTF18 ELP6 HTZ1 MMS4 SGS1 SWD3 ELC1 FRS2 TPK3 CHD1 SWD1 RPB7 RPC11 CAF40 IES5 NCB2 RRD2 CTF4 POL32 VMS1 EAP1 CTF8 RAD17 SWC5 TIM10 CSM3 RTF1 HDA3 TCO89 RAD57 DDC1 HPC2 NHP10 XRS2</i>                                                                                                                        |
| GO:0005634 | nucleus                           | 1.13E-08 | 4.84E-06    | 1.72 (4320,1588,109,69) | <i>PAT1 HIR3 MRC1 SIS2 RSC8 YKL069W YKE2 TPT1 SOK2 RAD9 ASF1 RIF1 CLA4</i>                                                                                                                                                                                                                                                                                                                  |

|            |                    |          |          |      |                     |                                                                                                                                                                                                                                                                                                                                                                                                                                                                                                                                                                                                                              |
|------------|--------------------|----------|----------|------|---------------------|------------------------------------------------------------------------------------------------------------------------------------------------------------------------------------------------------------------------------------------------------------------------------------------------------------------------------------------------------------------------------------------------------------------------------------------------------------------------------------------------------------------------------------------------------------------------------------------------------------------------------|
|            |                    |          |          |      |                     | MMS4 SKO1 ELC1 RAD52 CAF40 LSM7<br>NHP2 LSM6 CTF8 APQ12 SWC5 RTF1 HDA3<br>BUD21 RRD1 SOK1 RAD57 HPC2 SMI1<br>NHP10 XRS2 DOT1 RPS9B BMH1 CIK1<br>RAD24 LEA1 PPH21 RAD50 SPT2 CTF18<br>ELP6 HTZ1 SGS1 TPK3 SWD3 SWD1 CHD1<br>UPF3 RPC11 RPB7 SPN1 IES5 NCB2 POL32<br>CTF4 TEN1 RAD17 CSM3 SRS2 BDF2 IPP1<br>YPD1 DDC1 PUS7 BRE1                                                                                                                                                                                                                                                                                                |
| GO:0044424 | intracellular part | 1.13E-04 | 1.39E-02 | 1.13 | (4320,3670,109,105) | HIR3 STI1 MRC1 RSC8 SIS2 YKE2 TIM50<br>RAD9 ASF1 CLA4 MMS4 ELC1 MTC1 CAF40<br>PBY1 CTF8 APQ12 HDA3 BUD21 SOK1<br>AIM29 RAD57 NHP10 DOT1 RPS1B RPL14A<br>UBA4 CIK1 YPT6 RAD50 ATG3 HTZ1 SGS1<br>TPK3 SWD1 RPB7 SPN1 IES5 NCB2 RRD2<br>CTF4 TEN1 EAP1 PET20 GPB2 SRS2 IPP1<br>BDF2 BRE1 PUS7 SPE1 RPS0B PAT1 SUI2<br>MTC4 GIM4 YKL069W TPT1 REI1 SOK2<br>YKL075C RIF1 NMD2 SKO1 RAD52 TIF5<br>LSM7 NHP2 LSM6 SHR3 YMD8 SWC5 RTF1<br>RRD1 IMP2' HPC2 SMI1 XRS2 BMH1 RPS9B<br>TRM11 RAD24 RPL31B LEA1 PPH21 SPT2<br>CTF18 ELP6 SWD3 FRS2 ALT1 CHD1 UPF3<br>RPC11 POL32 VMS1 NST1 RAD17 TIM10<br>CSM3 RPS20 RTT10 TCO89 YPD1 DDC1 |
